# Supplementary material for: Membrane-anchored ubiquitin ligase complex is required for the turnover of lysosomal membrane proteins
Source: PubMed Central journal article supplement — J Cell Biol. 2015 Nov 9;211(3):639–52. doi: 10.1083/jcb.201505062 (PMC4639871; doi:10.1083/jcb.201505062), 2015-11-09
Supplement: supp_jcb.201505062_JCB_201505062_sm.pdf [file supp_jcb.201505062_JCB_201505062_sm.pdf]

Li et al., <http://www.jcb.org/cgi/content/full/jcb.201505062/DC1>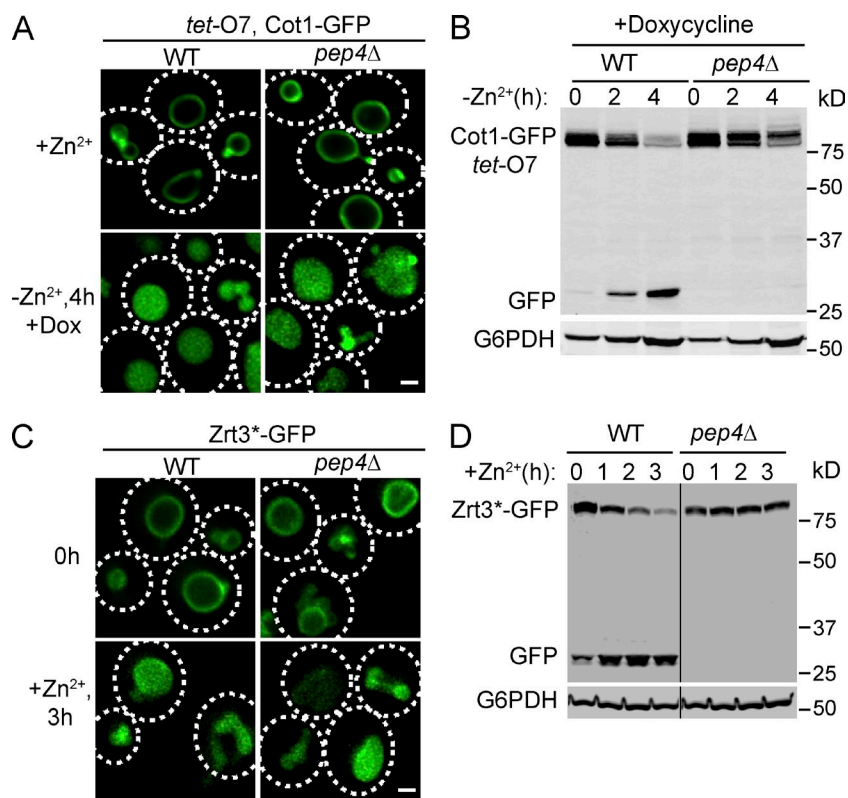

Figure S1. **Degradation of both Cot1-GFP and Zrt3\*-GFP happens in the vacuole lumen.** (A) Localization of *tet-O7 Cot1-GFP* in both WT and *pep4Δ* strains, before and after Zn<sup>2+</sup> withdrawal from the YNB media. (B) Degradation kinetics for *tet-O7 Cot1-GFP* in both WT and *pep4Δ* strains. G6PDH was used as a loading control. Same volume of cells was loaded, with 1 OD<sub>600</sub> cells loaded at 0 h. (C) Localization of *Zrt3\*-GFP* in wildtype and *pep4Δ* strains, before and after the addition of 2 mM ZnCl<sub>2</sub> in YNB media. Cells were pretreated with YNB without Zn<sup>2+</sup> for 3 h (0 h). (D) Degradation kinetics for *Zrt3\*-GFP* in WT and *pep4Δ* strains. G6PDH was used as a loading control. 1 OD<sub>600</sub> cells were loaded in each lane. Bar, 1 μm.

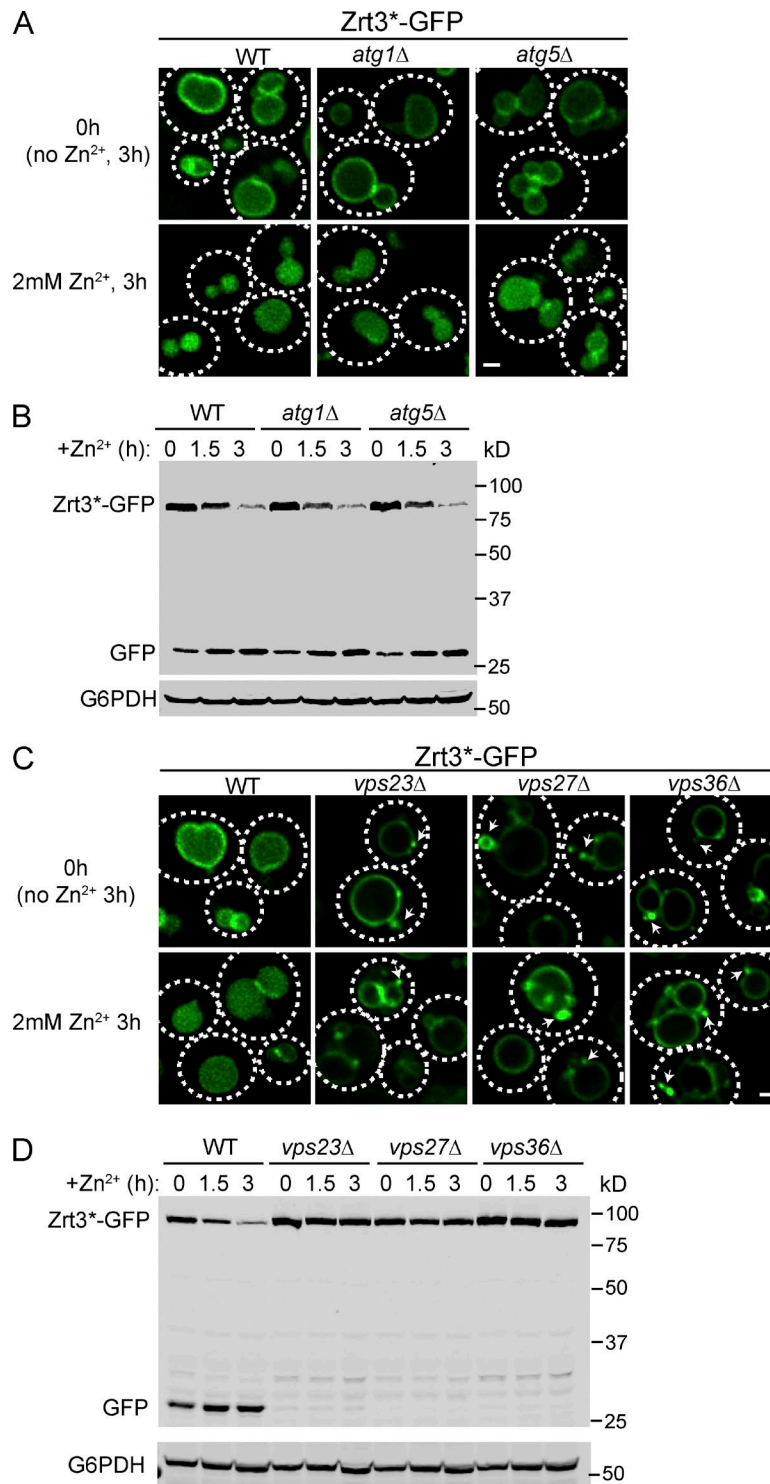

Figure S2. **ESCRTs, but not the autophagy machinery, are required for the degradation of Zrt3\*-GFP.** (A) Localization of Zrt3\*-GFP in WT and autophagy mutants before and after 2 mM ZnCl<sub>2</sub> treatment in YNB media. Cells were pretreated with YNB media without Zn<sup>2+</sup> for 3 h. (B) Degradation kinetics for Zrt3\*-GFP in WT and autophagy mutants. G6PDH was used as a loading control. Same volume of cells was loaded, with 1 OD<sub>600</sub> cells loaded at 0 h. (C) Localization of Zrt3\*-GFP in WT and ESCRT mutants before and after 2 mM ZnCl<sub>2</sub> treatment in YNB media. Cells were pretreated with YNB media without Zn<sup>2+</sup> for 3 h. Arrows highlight the aberrant endosomes. (D) Degradation kinetics for Zrt3\*-GFP in WT and ESCRT mutants. G6PDH was used as a loading control. Same volume of cells was loaded, with 1 OD<sub>600</sub> cells loaded at 0 h. Bar, 1 μm.

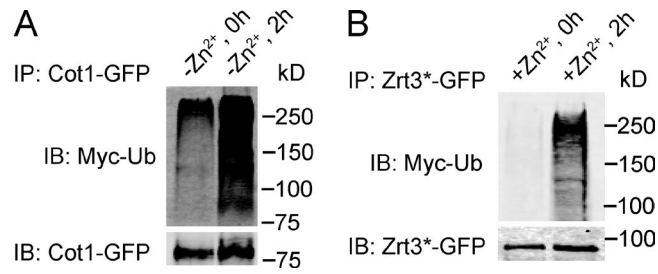

Figure S3. **Cot1-GFP and Zrt3\*-GFP are poly-ubiquitinated during their degradation.** (A)  $Zn^{2+}$  withdrawal from the YNB media triggered the poly-ubiquitination of Cot1-GFP. (B) Addition of 2 mM  $ZnCl_2$  to the YNB media triggered the poly-ubiquitination of Zrt3\*-GFP. Cells were pretreated with YNB media without  $Zn^{2+}$  for 3 h.

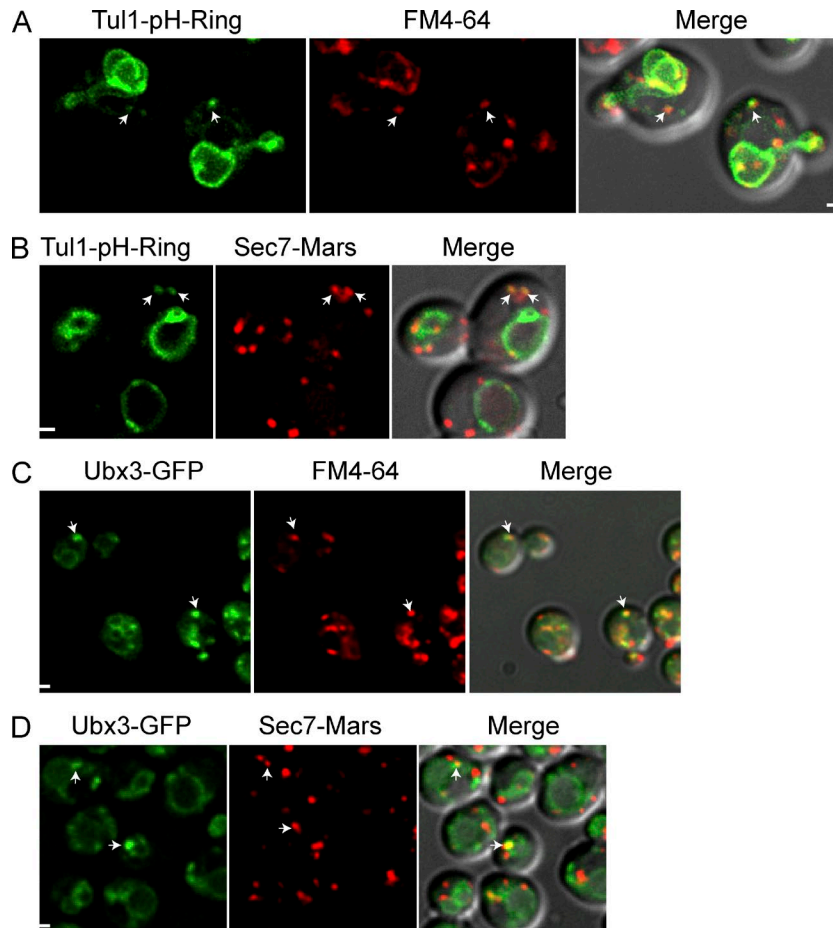

Figure S4. **A fraction of the Dsc complex localizes to Golgi and endosomes.** (A) A fraction of Tul1-pH-Ring colocalizes with FM4-64 labeled endosomes. The cells were stained with FM4-64 for 5 min before imaging. Arrows highlight the colocalization. (B) A fraction of Tul1-pH-Ring colocalizes with Sec7-Mars labeled Golgi. Arrows highlight the colocalization. (C) A fraction of Ubx3-GFP colocalizes with FM4-64-labeled endosomes. The cells were stained with FM4-64 for 5 min before imaging. Arrows highlight the colocalization. (D) A fraction of Ubx3-GFP colocalizes with Sec7-Mars labeled Golgi. Arrows highlight the colocalization. Bar, 1  $\mu$ m.

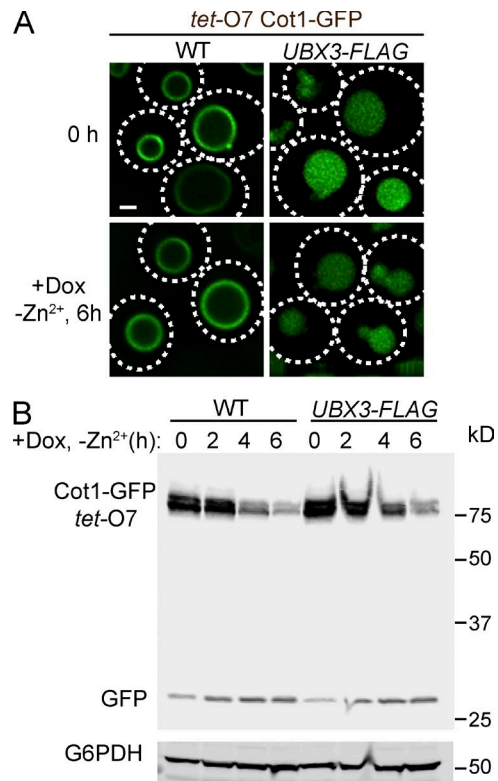

Figure S5. **Ubx3-Flag is functional.** (A) Localization of Cot1-GFP in WT and *UBX3-FLAG* strains, before and 6 h after Zn<sup>2+</sup> withdrawal from the YNB media. (B) Degradation kinetics for *tet-O7* Cot1-GFP in both WT and *UBX3-FLAG* strains. G6PDH was used as a loading control. 1 OD<sub>600</sub> cells were loaded in each lane. Bar, 1 μm.

Table S1. Yeast strains and plasmids used in this study

| Strain                                   | Name                    | Genotype                                                             | Reference/source      |
|------------------------------------------|-------------------------|----------------------------------------------------------------------|-----------------------|
| <i>Saccharomyces cerevisiae</i> strains  |                         |                                                                      |                       |
| SEY6210                                  | Wild type               | <i>Matx, leu1-3, 112 ura3-52 his3-200, trp1-901 lys2-801 suc2-D9</i> | Robinson et al., 1988 |
| SEY6210.1                                | Wild type               | <i>Mata, leu1-3, 112 ura3-52 his3-200, trp1-901 lys2-801 suc2-D9</i> | Robinson et al., 1988 |
| YML51                                    | YCF1-GFP                | 6210, YCF1-GFP::HIS3                                                 | This study            |
| YML52                                    | ZRC1-GFP                | 6210, ZRC1-GFP::HIS3                                                 | This study            |
| YML324                                   | COT1-GFP                | 6210, COT1-GFP::KAN                                                  | This study            |
| YML319                                   | ZRT3*-GFP               | 6210, ZRT3*-GFP::KAN                                                 | This study            |
| YML106                                   | FET5-GFP                | 6210, FET5-GFP::HIS3                                                 | This study            |
| YML108                                   | FTH1-GFP                | 6210, FTH1-GFP::HIS3                                                 | This study            |
| YYR1                                     | NCR1-GFP                | 6210, NCR1-GFP::HIS3                                                 | This study            |
| YML216                                   | GFP-VCX1                | 6210.1, GFP-VCX::KAN                                                 | This study            |
| YML577                                   | VPH1-mCherry            | 6210.1, VPH1-mCherry::HIS3                                           | This study            |
| YML100                                   | pep4Δ                   | 6210, pep4Δ::LEU2                                                    | This study            |
| YML228                                   | pep4Δ, ZRT3*-GFP        | 6210, ZRT3*-GFP::KAN, pep4Δ::LEU2                                    | This study            |
| YML260                                   | atg1Δ, COT1-GFP         | 6210.1, Cot1-GFP::KAN, atg1Δ::TRP1                                   | This study            |
| YML455                                   | atg5 Δ, COT1-GFP        | 6210.1, Cot1-GFP::KAN, atg5Δ::TRP1                                   | This study            |
| YML456                                   | atg7Δ COT1-GFP          | 6210.1, Cot1-GFP::KAN, atg7Δ::TRP1                                   | This study            |
| YML278                                   | atg1 Δ ZRT3*-GFP        | 6210.1, ZRT3* -GFP::KAN, atg1Δ::TRP1                                 | This study            |
| YML279                                   | atg5 Δ ZRT3*-GFP        | 6210.1, ZRT3*-GFP::KAN, atg5 Δ::TRP1                                 | This study            |
| YML445                                   | vps23 Δ, COT1-GFP       | 6210.1, COT1-GFP::KAN, vps23 Δ::TRP1                                 | This study            |
| YML446                                   | vps27 Δ, COT1-GFP       | 6210.1, COT1-GFP::KAN, vps27Δ::TRP1                                  | This study            |
| YML447                                   | vps36 Δ, COT1-GFP       | 6210.1, COT1-GFP::KAN, vps36Δ::TRP1                                  | This study            |
| YML448                                   | snf7 Δ, COT1-GFP        | 6210.1, COT1-GFP::KAN, snf7Δ::TRP1                                   | This study            |
| YML325                                   | vps4 Δ, COT1-GFP        | 6210.1, COT1-GFP::KAN, Vps4Δ::TRP1                                   | This study            |
| YML441                                   | vps23 Δ ZRT3*-GFP       | 6210.1, ZRT3*-GFP::KAN, vps23 Δ::TRP1                                | This study            |
| YML442                                   | vps27 Δ ZRT3*-GFP       | 6210.1, ZRT3*-GFP::KAN, vps27 Δ::TRP1                                | This study            |
| YML443                                   | vps36 Δ ZRT3*-GFP       | 6210.1, ZRT3*-GFP::KAN, vps36 Δ::TRP1                                | This study            |
| YML354                                   | ssh4 Δ                  | 6210, ssh4 Δ::TRP1                                                   | This study            |
| YML165                                   | rsp5-1                  | 6210, rsp5-1                                                         | Li et al., 2015       |
| YML489                                   | tul1Δ                   | 6210.1, tul1Δ::TRP1                                                  | This study            |
| YML802                                   | ssh4Δ ZRT3*-GFP         | 6210.1, ZRT3*-GFP::KAN, ssh4 Δ::TRP1                                 | This study            |
| YML803                                   | tul1Δ, rsp5-1 ZRT3*-GFP | 6210, ZRT3*-GFP::KAN, rsp5-1, tul1Δ::TRP1                            | This study            |
| YML329                                   | tul1Δ, ZRT3*-GFP        | 6210.1, ZRT3*-GFP::KAN, tul1Δ::TRP1                                  | This study            |
| YML232                                   | rsp5-1, ZRT3*-GFP       | 6210, ZRT3*-GFP::KAN, rsp5-1                                         | This study            |
| YML477                                   | dsc2Δ                   | 6210.1, dsc2Δ::TRP1                                                  | This study            |
| YML479                                   | dsc3Δ                   | 6210.1, dsc3Δ::TRP1                                                  | This study            |
| YML622                                   | dsc5Δ                   | 6210.1, dsc5Δ::HIS3                                                  | This study            |
| YML515                                   | dsc5Δ COT1-GFP          | 6210.1, COT1-GFP::KAN, dsc5Δ::TRP1                                   | This study            |
| YML478                                   | dsc2Δ COT1-GFP          | 6210.1, COT1-GFP::KAN, dsc2Δ::TRP1                                   | This study            |
| YML480                                   | dsc3Δ COT1-GFP          | 6210.1, COT1-GFP::KAN, dsc3Δ::TRP1                                   | This study            |
| YML519                                   | cdc48 <sup>E315K</sup>  | 6210.1,cdc48Δ::TRP1, pRS415 cdc48 <sup>E315K</sup>                   | This study            |
| YML234                                   | YPQ2-GFP                | 6210.1,YPQ2-GFP::TRP1                                                | This study            |
| YML169                                   | VPH1-GFP                | 6210.1, VPH1-GFP::KAN                                                | This study            |
| YYR6                                     | YPQ1-GFP                | 6210, YPQ1-GFP::TRP1                                                 | Li et al., 2015       |
| YML235                                   | VBA4-GFP                | 6210, VBA4-GFP::TRP1                                                 | Li et al., 2015       |
| YML321                                   | YPL162C-GFP             | 6210.1, YPL162C-GFP::TRP1                                            | This study            |
| YML417                                   | tul1Δ, COT1-Mars        | 6210.1, COT1-Mars::TRP1, tul1Δ::HIS3                                 | This study            |
| YML486                                   | UBX3-GFP                | 6210.1, UBX3-GFP::TRP1                                               | This study            |
| YML856                                   | UBX3-FLAG               | 6210.1, UBX3-3xFLAG::HIS3                                            | This study            |
| YML799                                   | UBX3-GFP, Mars-SEC7     | 6210.1, UBX3-GFP::HIS3 Mars-SEC7::TRP1                               | This study            |
| YML225                                   | Mars-SEC7               | 6210.1, Mars-SEC7::TRP1                                              | This study            |
| YML499                                   | pep4Δ UBX3-3xFLAG       | 6210, pep4Δ::LEU2 UBX3-3xFLAG::HIS3                                  | This study            |
| YML853                                   | doa4Δ, estro-GAL4       | 6210.1, doa4Δ::HIS3, PADH1-GAL4BD-her-VP16::TRP1                     | This study            |
| <i>S. cerevisiae</i> expression plasmids |                         |                                                                      |                       |
| pCM189                                   | COT1-GFP                | Tet-off vector, tetO7 promoter C-terminal GFP                        | This study            |
| pRS415                                   | cdc48 <sup>E315K</sup>  | Native promoter and terminator of CDC48, E315 mutated to K           | This study            |
| pCM189                                   | TUL1                    | Tet-off vector, tetO7 promoter, for Tul1 overexpression              | This study            |

Table S1. Yeast strains and plasmids used in this study (Continued)

| Strain | Name                | Genotype                                                                                                        | Reference/source |
|--------|---------------------|-----------------------------------------------------------------------------------------------------------------|------------------|
| pCM189 | <i>SSH4</i>         | Tet-off vector, <i>tet-O7</i> promoter, for Ssh4 overexpression                                                 | This study       |
| pCM189 | <i>TUL1-GFP</i>     | Tet-off vector, <i>tet-O7</i> promoter C-terminal GFP, for Tul1-GFP overexpression                              | This study       |
| pCM189 | <i>TUL1-pH-RING</i> | Tet-off vector, <i>tet-O7</i> promoter pHluorin inserted between G689 and G690, for Tul1-pH-RING overexpression | This study       |
| pRS425 | <i>pGal1-MYC-UB</i> | GAL1 promoter, used together with YML853 for overexpression of Myc-Ub by addition of 100 nM $\beta$ -estradiol  | This study       |
| pRS416 | <i>Zrt3*-GFP</i>    | Endogenous promoter                                                                                             | This study       |

Table S2. Tested vacuolar membrane transporters

| Name                       | Localization of GFP-tagged protein | Function                                                                                        |
|----------------------------|------------------------------------|-------------------------------------------------------------------------------------------------|
| <i>AVT1</i>                | No signal                          | Imports large neutral amino acids; related to vesicular GABA-glycine transporters               |
| <i>AVT2</i>                | No signal                          | Imports large neutral amino acids; related to vesicular GABA-glycine transporters               |
| <i>AVT3</i>                | Stuck in ER                        | Imports large neutral amino acids; related to vesicular GABA-glycine transporters               |
| <i>AVT4</i>                | No signal                          | Imports large neutral amino acids; related to vesicular GABA-glycine transporters               |
| <i>AVT5</i>                | No signal                          | Imports large neutral amino acids; related to vesicular GABA-glycine transporters               |
| <i>AVT6</i>                | No signal                          | Aspartate and glutamate exporter; related to vesicular GABA-glycine transporters                |
| <i>AVT7</i>                | Stuck in ER                        | Imports large neutral amino acids; related to vesicular GABA-glycine transporters               |
| <i>CCC1</i>                | Vacuole lumen                      | Putative vacuolar $Fe^{2+}/Mn^{2+}$ transporter                                                 |
| <i>COT1</i>                | Vacuole membrane                   | Zinc transport into the vacuole                                                                 |
| <i>CTR2</i>                | Stuck in ER                        | Putative low-affinity copper transporter of the vacuolar membrane                               |
| <i>ERS1</i>                | No signal                          | Efflux of cystine                                                                               |
| <i>FET5</i>                | Vacuole membrane                   | Multicopper oxidase; may have a role in iron transport                                          |
| <i>FTH1</i>                | Vacuole membrane                   | Putative high-affinity iron transporter; involved in transport of intravacuolar stores of iron  |
| <i>NCR1</i>                | Vacuole membrane                   | Involved in ergosterol transport and sphingolipid metabolism, homologue of mammalian NPC1       |
| <i>OPT2</i>                | No signal                          | Oligopeptide transporter                                                                        |
| <i>PHO91</i>               | Stuck in ER                        | Low-affinity phosphate transporter of the vacuolar membrane                                     |
| <i>VBA1</i>                | No signal                          | Permease for cationic amino acids                                                               |
| <i>VBA2</i>                | No signal                          | Permease for cationic amino acids                                                               |
| <i>VBA3</i>                | No signal                          | Permease for cationic amino acids                                                               |
| <i>VBA4<sup>a</sup></i>    | Vacuole membrane                   | Permease for cationic amino acids                                                               |
| <i>VCX1</i>                | N-terminal GFP, vacuole membrane   | H/ $Ca^{2+}$ antiporter                                                                         |
| <i>VMA16</i>               | Stuck in ER                        | Subunit C of the vacuolar ATPase                                                                |
| <i>VMR1</i>                | No signal                          | ABC transporter involved in multidrug transport                                                 |
| <i>VTC1</i>                | Stuck in ER                        | Subunit of the vacuolar transporter chaperone (VTC) complex                                     |
| <i>VTC2</i>                | Stuck in ER                        | Subunit of the vacuolar transporter chaperone (VTC) complex                                     |
| <i>VTC3</i>                | No signal                          | Subunit of the vacuolar transporter chaperone (VTC) complex                                     |
| <i>VTC4</i>                | Stuck in ER                        | Involved in synthesis and transfer of polyP to the vacuole                                      |
| <i>YCF1</i>                | Vacuole membrane                   | ABC transporter and glutathione S-conjugate transporter; also transports unconjugated bilirubin |
| <i>YPL162C<sup>b</sup></i> | Vacuole membrane                   | Protein of unknown function                                                                     |
| <i>YPQ2<sup>a</sup></i>    | Vacuole membrane                   | Vacuolar membrane transporter for cationic amino acids                                          |
| <i>YVC1</i>                | Stuck in ER                        | Cation channel, mediates release of $Ca^{2+}$                                                   |
| <i>ZRC1</i>                | Vacuole membrane                   | Zinc transporter; transports zinc from the cytosol into the vacuole for storage                 |
| <i>ZRT3*</i>               | Vacuole membrane                   | Zinc transporter; transports zinc from vacuole to the cytoplasm                                 |

<sup>a</sup>Tested in a previous study (Li et al., 2015).

<sup>b</sup>Not tested because the function is unknown.

Table S3. **Tested E3 ubiquitin ligases**

| Gene deleted   | Note                                                  | Blocked Cot1-GFP degradation?            |
|----------------|-------------------------------------------------------|------------------------------------------|
| <i>RKR1</i>    | RING finger protein YMR247C                           | No                                       |
| <i>UBR2</i>    | E3 ubiquitin-protein ligase UBR2                      | No                                       |
| <i>HRT3</i>    | F-box protein HRT3                                    | No                                       |
| <i>UFO1</i>    | Ubiquitin ligase complex F-box protein UFO1           | No                                       |
| <i>HRD1</i>    | ERAD-associated E3 ubiquitin-protein ligase HRD1      | No                                       |
| <i>DIA2</i>    | Protein DIA2                                          | No                                       |
| <i>SKP2</i>    | F-box protein YNL311C                                 | No                                       |
| <i>SAN1</i>    | Protein SAN1                                          | No                                       |
| <i>YDR131C</i> | F-box protein YDR131C                                 | No                                       |
| <i>MOT2</i>    | General negative regulator of transcription subunit 4 | No                                       |
| <i>UBR1</i>    | E3 ubiquitin-protein ligase UBR1                      | No                                       |
| <i>UFD4</i>    | Ubiquitin fusion degradation protein 4                | No                                       |
| <i>TUL1</i>    | Transmembrane E3 ubiquitin-protein ligase 1           | Yes                                      |
| <i>YLR224W</i> | F-box protein YLR224W                                 | No                                       |
| <i>MDM30</i>   | Mitochondrial distribution and morphology protein 30  | No                                       |
| <i>RCY1</i>    | Recyclin-1                                            | No                                       |
| <i>YJL149W</i> | F-box protein                                         | No                                       |
| <i>YLR352W</i> | F-box protein                                         | No                                       |
| <i>ELA1</i>    | Elongin-A                                             | No                                       |
| <i>AMA1</i>    | Meiosis-specific APC/C activator protein              | No                                       |
| <i>CDH1</i>    | APC/C activator protein                               | No                                       |
| <i>PIB1</i>    | E3 ubiquitin-protein ligase                           | A subtle defect observed on Western blot |
| <i>YDR306C</i> | F-box protein                                         | No                                       |
| <i>ASI1</i>    | Amino acid sensor-independent protein 1               | No                                       |
| <i>RAD5</i>    | DNA repair protein RAD5                               | No                                       |
| <i>UFD2</i>    | Ubiquitin conjugation factor E4                       | No                                       |
| <i>RAD7</i>    | DNA repair protein                                    | No                                       |
| <i>HUL4</i>    | Probable E3 ubiquitin-protein ligase                  | No                                       |
| <i>RAD18</i>   | Postreplication repair E3 ubiquitin-protein ligase    | No                                       |
| <i>SAF1</i>    | F-box protein                                         | No                                       |
| <i>ASI3</i>    | Amino acid sensor-independent protein 3               | No                                       |
| <i>TOM1</i>    | E3 ubiquitin-protein ligase                           | No                                       |
| <i>SSM4</i>    | E3 ubiquitin-protein ligase                           | No                                       |
| <i>HUL5</i>    | Probable E3 ubiquitin-protein ligase                  | No                                       |
| <i>BRE1</i>    | E3 ubiquitin-protein ligase                           | No                                       |
| <i>GRR1</i>    | SCF E3 ubiquitin ligase complex F-box protein         | No                                       |
| <i>MET30</i>   | F-box protein                                         | No                                       |
| <i>CDC4</i>    | Cell division control protein 4                       | No                                       |

## References

- Li, M., Y. Rong, Y.S. Chuang, D. Peng, and S.D. Emr. 2015. Ubiquitin-dependent lysosomal membrane protein sorting and degradation. *Mol. Cell.* 57:467–478. <http://dx.doi.org/10.1016/j.molcel.2014.12.012>
- Robinson, J.S., D.J. Klionsky, L.M. Banta, and S.D. Emr. 1988. Protein sorting in *Saccharomyces cerevisiae*: isolation of mutants defective in the delivery and processing of multiple vacuolar hydrolases. *Mol. Cell. Biol.* 8:4936–4948. <http://dx.doi.org/10.1128/MCB.8.11.4936>
